# Supplementary material
Source: HighWire-hosted journal article supplement (http://www.cmaj.ca/highwire/filestream/147886/field_highwire_adjunct_files/0/220673-res-1-at.pdf)
Supplement: 220673-res-1-at.pdf [file 220673-res-1-at.pdf]

**Sex- and Age-Based Achievement of Type II Diabetes Clinical and Treatment Targets in Canadian Primary Care (2015-2020): A Multi-Provincial Serial Cross-Sectional Study**

**Brief Title: Achievement of Type 2 Diabetes Targets in Canada (2015-2020)**

**SUPPLEMENT**

**SUPPLEMENTAL METHODS**

**SUPPLEMENTAL RESULTS**

Shiva NANDIWADA<sup>1</sup> MD, Donna P. MANCA<sup>2</sup> MD MCISc, Roseanne O. Yeung<sup>1</sup> MD MPH, and Darren LAU<sup>1</sup> MD PhD\*

<sup>1</sup> Department of Medicine, University of Alberta, Edmonton, Canada

<sup>2</sup> Department of Family Medicine, University of Alberta, Edmonton, Canada

\* Corresponding author

# Supplementary Methods

## **More details regarding CPCSSN**

CPCSSN, the largest and only pan-Canadian primary care EMR database, is comprised of provincial primary care practice-based research networks, themselves comprised of multiple full-service, primary care clinics in academic (19%) and non-academic (81%) settings.<sup>1,2</sup>

Participating practices contribute de-identified data to CPCSSN on all of their patients, except in Quebec, where consent for participation is obtained from each patient. The available EMR data includes demographics, health conditions, physical parameters, encounter data, medications, lab data, smoking status, and billing codes.<sup>3</sup> These data have been used in previous research.<sup>4,5</sup>

The NDR abstract contains data from > 140,000 adults with diabetes from 7 practice-based research networks across Canada (2 from Alberta, 1 from Manitoba, 1 from Newfoundland, 2 from Ontario, and 1 from Quebec), using a validated case definition for diabetes.<sup>6</sup>

### **Inspection-Driven Cut-Offs for Outlier Values of Physical Parameters**

SBP < 0.1<sup>th</sup> or > 99.9<sup>th</sup> percentile (<82mmHg or >203mmHg)

DBP < 0.1<sup>th</sup> or > 99.9<sup>th</sup> percentile (<43mmHg or >115mmHg)

BMI < 0.2<sup>th</sup> or > 99.6<sup>th</sup> percentile (<16.5kg/m<sup>2</sup> or >100kg/m<sup>2</sup>)

Height < 0.3<sup>th</sup> or > 99.9<sup>th</sup> percentile (<72cm or >198cm)

Weight < 0.1<sup>th</sup> or > 99.9<sup>th</sup> percentile (<36kg or >230kg)

Outliers on inspection were highly likely to represent data entry errors (e.g.: missing digits, height of 70cm entered instead of 170cm) – These were changed to “missing”.

## ATC codes for ascertainment of medication use

| Medication Class                              | Abbreviation | ATC Code (as a Regular Expression)*                                                      |
|-----------------------------------------------|--------------|------------------------------------------------------------------------------------------|
| Metformin                                     | MET          | A10B(A D(0[123578] 1[013-8] 2[0235]))                                                    |
| Sulfonylurea                                  | SU           | A10B(B (D0[1246]))                                                                       |
| Alpha-glucosidase Inhibitor                   | AGI          | A10B(F D17)                                                                              |
| Thiazolidinediones                            | TZD          | A10B(G D(0[34569] 12))                                                                   |
| Dipeptidyl peptidase-4 inhibitor              | DPP4         | A10B(H D(0[789] 1[012389] 2[1245]))                                                      |
| Glucagon-like peptide-1 receptor agonist      | GLP1         | A10(BJ AE5[46])                                                                          |
| Sodium-glucose cotransporter-2 inhibitor      | SGLT2        | A10B(K D(1[569] 2[01345]) X(09 1[12]))                                                   |
| Meglitinides                                  | MEG          | A10B(X0[238] D14)                                                                        |
| Pramlintide                                   | PRAM         | A10BX05                                                                                  |
| Basal Insulin                                 | BASAL        | A10A[ECD]                                                                                |
| Bolus Insulin                                 | BOLUS        | A10A[BD]                                                                                 |
| ACE inhibitor or angiotensin receptor blocker | ACEi/ARB     | C09<br>C10BX0[467] C10BX1{012345678} A10BH51 A10BH52<br>Not: C09(DX04 BX0[467] BX1[0-7]) |
| Statin                                        | Statin       | ^C10AA ^C10BX                                                                            |

\* Provided in the form of a regular expression for use with STATA's `regexpr()` or SAS's `PRXPARSE()` functions.

## Case Definitions for Relevant Comorbidities and Diabetes Complications

Our approach to comorbidities and diabetes complications is as follows.

First, if there was a validated EMR-based case definition (diabetes, hypertension, heart failure), we used it. EMR case definitions are typically based on ICD-9 billing or health condition codes, which (depending on the definition) can be abstracted directly from the EMR or abstracted from free text analysis looking for certain key words. They are validated against manual (human) chart abstraction from the EMR. Manual chart abstraction is considered the criterion standard for the presence or absence of a condition. Well-accepted administrative data case definitions are typically validated against manual chart abstraction as well.

Second, coronary artery disease (CAD), stroke, hypoglycemia did not have validated EMR-based case definitions, but there were validated administrative data-based case definitions.

Administrative database definitions typically take the form of “1 hospital discharge diagnosis or 2 or more outpatient physician billings with a certain diagnosis”. This could be translated into “1 health conditions table entry or 2 or more physician billings with a certain diagnosis” for use with CPCSSN data. We recognize that the performance of an administrative data-based case definition will not be the same as the performance of the same case definition in the EMR.

However, for coronary artery disease, we had both an administrative data-based definition, and an EMR-based case definition validated in a single Ontario practice-based research network (UTOPIAN, Toronto). We performed a mini-validation of the administrative data-based

definition using the EMR-based definition as the gold standard in UTOPIAN NDR data, and found good performance characteristics<sup>7,8</sup>:

|                                 |     | UTOPIAN definition of IHD |      |           |
|---------------------------------|-----|---------------------------|------|-----------|
|                                 |     | NEG                       | POS  | ROW total |
| Admin data-based CAD definition | NEG | 43296                     | 923  | 44219     |
|                                 | POS | 1298                      | 6344 | 7642      |
| COL total                       |     | 44594                     | 7267 | 51861     |

The performance characteristics were as follows: sensitivity 87%, specificity 97%, positive predictive value 83%, negative predictive value 98%. Based on these findings, our importation of administrative data-based definitions for use with CPCSSN data is reasonable – imperfect, but “fit for purpose”, so to speak.

Third, diabetes complications had neither clearly validated EMR-based case definitions, nor administrative data-based case definitions. In their development of coding algorithms for the Charlson and Elixhauser comorbidity scores, Quan et al. distinguished uncomplicated and complicated diabetes. The codes that make up complicated diabetes may be considered validated in that the complicated diabetes category contributed independently to the estimation of in-hospital mortality. These codes were pulled out to populate diabetic retinopathy and neuropathy, with some manual inspection of ICD-9 codes and adjustments. Notably, the prevalence of these conditions was rare.

It is important to recognize the importance of diabetes and coronary artery disease to this study. The former defines the study sample, while the latter is the most common and most

important indication for ACEi / statin / LDLc-lowering outside of age  $\geq$  40. Chronic kidney disease, another common and important ACEi indication, was estimated from laboratory values, so did not require a diagnostic code-based case definition. All the other conditions were helpful in describing the study sample, but contributed little to the numerators or denominators for the proportion of adults achieving treatment targets (LDLc/statin/ACEi), and were irrelevant to HbA1c and BP achievement proportions.

## Specific definitions and sources

**Diabetes:** Two billings or one entry in the health conditions table with ICD-9 code 250.

Reference: Williamson T, Green ME, Birtwhistle R, Khan S, Garies S, Wong ST, Natarajan N, Manca D, Drummond N. Validating the 8 CPCSSN case definitions for chronic disease surveillance in a primary care database of electronic health records. *Ann Fam Med*. 2014;12(4):367-372.

**Heart failure:** Two billings or one entry in the health conditions table with ICD-9 codes 428.x or 425.x; or current use of ACEi/ARB *and* beta-blocker *and* diuretic (spironolactone, eplerenone, furosemide, or indapamide).

Reference: Vijh, Rohit et al. Identifying heart failure in patients with chronic obstructive lung disease through the Canadian Primary Care Sentinel Surveillance Network in British Columbia: a case derivation study. *CMAJ Open*. 2021;9(2):E376-E383.

**Hypertension:** Two billings or one entry in the health conditions table with ICD-9 codes 401, 402, 403, 404, 405.

Reference: Garies, S., McBrien, K., Quan, H. et al. A data quality assessment to inform hypertension surveillance using primary care electronic medical record data from Alberta, Canada. *BMC Public Health*. 2021;21:264.

**Coronary artery disease:** Two billings or one entry in the health conditions table with ICD-9 codes 410, 412, or 413. ICD-9 code 414.x (except 414.1) was added after it improved performance characteristics (improved positive and negative predictive values) for coronary artery disease according to the UTOPIAN case definition, in the subset of UTOPIAN patients.



Reference: Tu K, Mitiku T, Lee DS, Guo H, Tu JV. Validation of physician billing and hospitalization data to identify patients with ischemic heart disease using data from the Electronic Medical Record Administrative data Linked Database (EMRALD). *Can J Cardiol.* 2010;26(7):e225-e228.

**Stroke:** Two billings or one entry in the health conditions table with ICD-9 codes 430-438.

References:

- McCormick N, Bhole V, Lacaille D, Avina-Zubieta JA. "Validity of Diagnostic Codes for Acute Stroke in Administrative Databases: A Systematic Review." *PloS One.* 2015;10(8):e0135834.
- Tu K, Wang M, Young J, Green D, Ivers NM, Butt D, Jaakkimainen L, Kapral MK. Validity of administrative data for identifying patients who have had a stroke or transient ischemic attack using EMRALD as a reference standard. *Can J Cardiol.* 2013;29(11):1388-1394.

**Hypoglycemia:** Two billings or one entry in the health conditions table with ICD-9 codes meeting the following algorithm:

(ICD-9 codes 251.0, 251.1, 251.2, 270.3, 775.0, 775.6, or 962.3)

OR

(ICD-9 code 250.8 *without any concomitant instance of* 259.8, 272.7, 681.xx, 682.xx, 686.9x, 707.1-707.9, 709.3, 730.0-730.2, 731.8)

Reference: Ginde AA, Blanc PG, Lieberman RM, Camargo CA Jr. Validation of ICD-9-CM coding algorithm for improved identification of hypoglycemia visits. *BMC Endocr Disord.* 2008;8:4.

**Diabetic ophthalmopathy:** Two billings or one entry in the health conditions table with ICD-9 codes 366, 362.0-3, 362.8-9, 250.5.

Reference: Quan H, Sundararajan V, Halfon P, Fong A, Burnand B, Luthi JC, Saunders LD, Beck CA, Feasby TE, Ghali WA. Coding algorithms for defining comorbidities in ICD-9-CM and ICD-10 administrative data. *Med Care*. 2005 Nov;43(11):1130-9.

**Diabetic neuropathy:** Two billings or one entry in the health conditions table with ICD-9 codes 354-357, 337.1, 337.9, 337.00, 249.x6, 250.x6.

Reference: Quan H, Sundararajan V, Halfon P, Fong A, Burnand B, Luthi JC, Saunders LD, Beck CA, Feasby TE, Ghali WA. Coding algorithms for defining comorbidities in ICD-9-CM and ICD-10 administrative data. *Med Care*. 2005 Nov;43(11):1130-9.

## Adjusted Logistic Regression Model

$$\begin{aligned} \text{logit}[Y_i] = & \alpha + \beta_{\text{female}}X_{\text{female}} + \beta_{\text{age}<40}X_{\text{age}<40} + \beta_{\text{age}40-64}X_{\text{age}40-64} + \beta_{2020}X_{2020} \\ & + \beta_{\text{female*age}<40}X_{\text{female}X_{\text{age}<40}} + \beta_{\text{female*age}40-64}X_{\text{female}X_{\text{age}40-64}} \\ & + \beta_{2020*\text{age}<40}X_{2020X_{\text{age}<40}} + \beta_{2020*\text{age}40-64}X_{2020X_{\text{age}40-64}} + \beta_{\text{CAD}}X_{\text{CAD}} \\ & + \beta_{\text{stroke}}X_{\text{stroke}} + \beta_{\text{HF}}X_{\text{HF}} + \beta_{\text{CKD1}}X_{\text{CKD1}} + \beta_{\text{CKD2}}X_{\text{CKD2}} + \beta_{\text{CKD3}}X_{\text{CKD3}} \\ & + \beta_{\text{CKD4}}X_{\text{CKD4}} + \beta_{\text{CKD5}}X_{\text{CKD5}} + \beta_{\text{documented hypo}}X_{\text{documented hypo}} \end{aligned}$$

## Supplement References

See **Specific Definitions and Sources** for references for case definitions.

1. Queenan JA, Williamson T, Khan S, et al. Representativeness of patients and providers in the Canadian Primary Care Sentinel Surveillance Network: a cross-sectional study. *CMAJ Open*. 2016;4:E28-32.
2. Garies S, Birtwhistle R, Drummond N, Queenan J, Williamson T. Data Resource Profile: National electronic medical record data from the Canadian Primary Care Sentinel Surveillance Network (CPCSSN). *Int J Epidemiol*. 2017;46:1091-2f.
3. National Diabetes Repository. *Data Dictionary*. Toronto, ON: Diabetes Action Canada; 2021. <https://repository.diabetesaction.ca/wp-content/uploads/2021/09/vimo.htm>. Last accessed September 30, 2022.
4. Greiver M, Williamson T, Barber D, et al. Prevalence and epidemiology of diabetes in Canadian primary care practices: a report from the Canadian Primary Care Sentinel Surveillance Network. *Can J Diabetes*. 2014;38:179-85.
5. Coons MJ, Greiver M, Aliarzadeh B, et al. Is glycemia control in Canadians with diabetes individualized? A cross-sectional observational study. *BMJ Open Diabetes Res Care*. 2017;5:e000316.
6. Williamson T, Green ME, Birtwhistle R, et al. Validating the 8 CPCSSN case definitions for chronic disease surveillance in a primary care database of electronic health records. *Ann Fam Med*. 2014;12:367-72.
7. Ivers N, Pylypenko B, Tu K. Identifying patients with ischemic heart disease in an electronic medical record. *J Prim Care Community Health*. 2011;2:49-53.
8. Bodoarca R, Yeung RO, Lau D. New Diabetes Guidelines: Impact on Eligibility for Sodium-glucose Cotransporter-2 Inhibitors and Glucagon-like Peptide-1 Receptor Agonists in Canada. *Can J Diabetes*. 2022.

# Supplemental Results

Figure S1: Inclusion / Exclusion of Adults with Diabetes in 2015

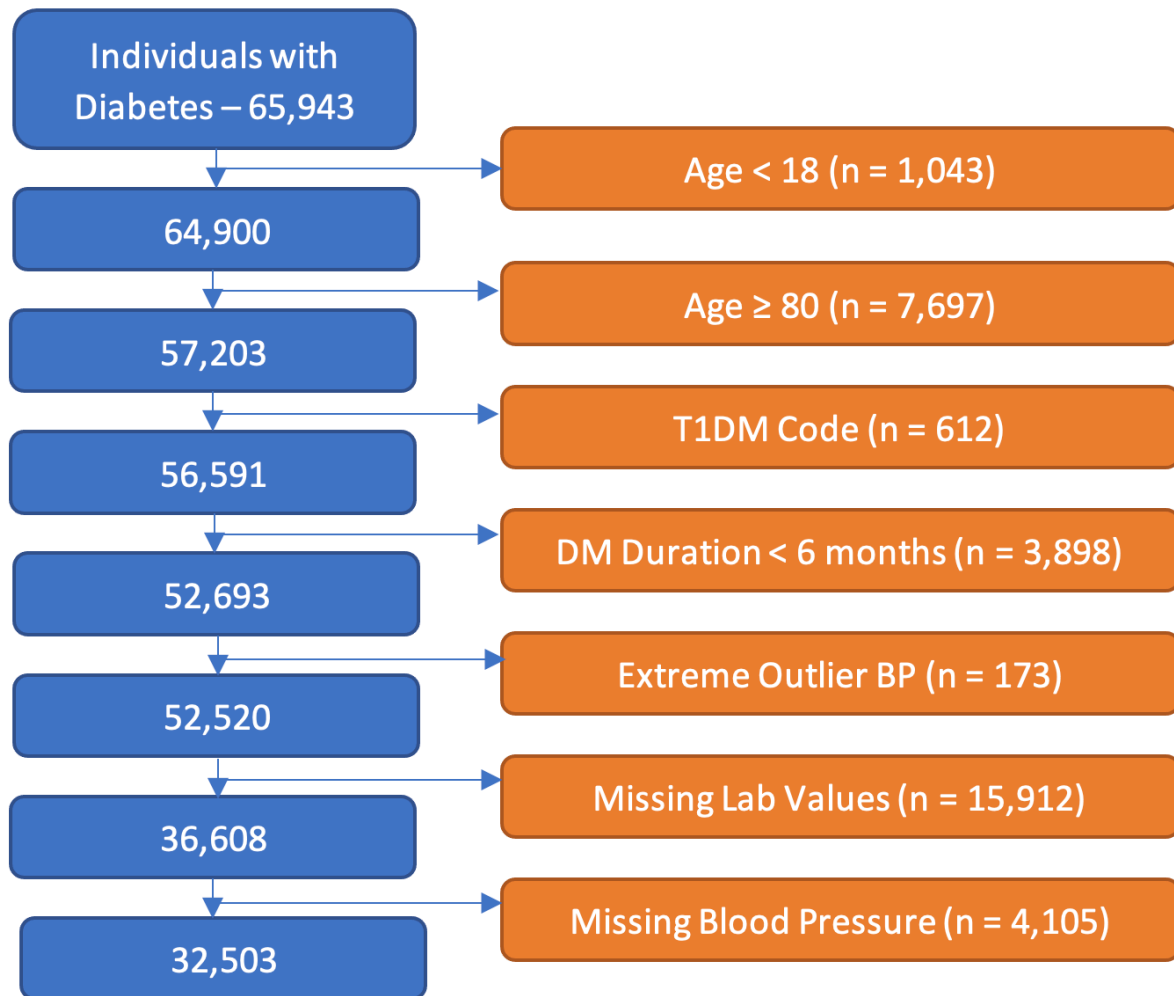

**Figure S2: Frequency of Missing Measurements by Age and Sex – 2020 vs 2015**

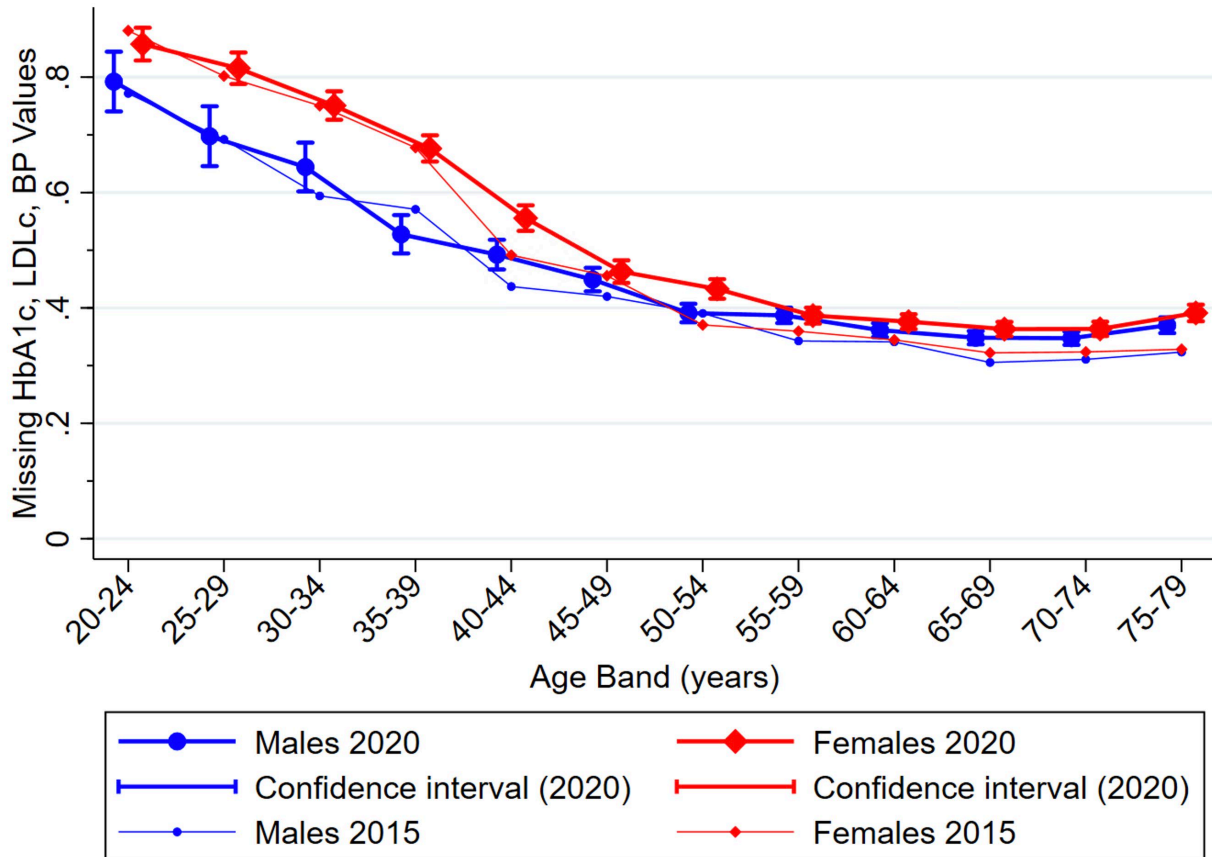

Missing measurements defined as no measurement within the previous two years on one or more of HbA1c, BP, LDLc, or serum creatinine. Unlike the similar-appearing Figure 2 in the main manuscript, this figure documents the frequency of an undesirable outcome.

**Table S1: Frequency of Non-Missing Measurements by Age and Sex Groups – 2020 vs 2015**

| Variable                        | Age   | Male  |       |                      |         | Female |       |                      |         |
|---------------------------------|-------|-------|-------|----------------------|---------|--------|-------|----------------------|---------|
|                                 |       | 2015  | 2020  | Difference           | P-value | 2015   | 2020  | Difference           | P-value |
| <b>Non-Missing Measurements</b> | All   | 64.0% | 61.2% | -2.8% (-2.0%, -3.5%) | <0.001  | 59.7%  | 56.2% | -3.5% (-2.7%, -4.3%) | <0.001  |
|                                 | <40   | 37.0% | 37.2% | 0.2% (-3.0%, 3.4%)   | 0.897   | 24.0%  | 24.8% | 0.9% (-1.1%, 2.9%)   | 0.399   |
|                                 | 40-64 | 63.0% | 60.5% | -2.5% (-1.5%, -3.6%) | <0.001  | 61.6%  | 57.9% | -3.7% (-2.6%, -4.9%) | <0.001  |
|                                 | 65-79 | 68.8% | 64.6% | -4.2% (-3.1%, -5.3%) | <0.001  | 67.6%  | 62.9% | -4.7% (-3.5%, -5.9%) | <0.001  |

Missing measurements defined as no measurement within the previous two years on one or more of HbA1c, BP, LDLc, or serum creatinine. Unlike the similar-appearing Table 3 in the main manuscript, this table documents the frequency of an undesirable outcome.

**Table S2: Comparison of Included Adults and Adults Excluded for Missing Measurements  
(2020)**

| Characteristics                                       |             | Excluded – Missing Measurements | Included    |
|-------------------------------------------------------|-------------|---------------------------------|-------------|
| Number (n)                                            |             | 31571                           | 44930       |
| <b>Demographics (n%) unless otherwise specified)</b>  |             |                                 |             |
| Province                                              | AB          | 7285 (23%)                      | 9723 (22%)  |
|                                                       | ON          | 15787 (50%)                     | 27687 (62%) |
|                                                       | QC          | 1577 (5%)                       | 816 (2%)    |
|                                                       | NL          | 70 (0%)                         | 222 (0%)    |
|                                                       | MN          | 6852 (22%)                      | 6482 (14%)  |
| Age (mean(sd))                                        |             | 57.7 (14.7)                     | 62.3 (11.2) |
| Sex                                                   | Male        | 14908 (47%)                     | 23522 (52%) |
|                                                       | Female      | 16663 (53%)                     | 21408 (48%) |
| Diabetes duration (mean(sd))                          |             | 6.0 (4.9)                       | 6.5 (5.3)   |
| Current smoker                                        |             | 2111 (26%)                      | 1807 (20%)  |
| BMI (mean(sd))                                        |             | 32.3 (7.4)                      | 32.3 (7.1)  |
| <b>Comorbidities (n%)</b>                             |             |                                 |             |
| CAD                                                   |             | 3032 (10%)                      | 5613 (12%)  |
| CHF                                                   |             | 1468 (5%)                       | 2223 (5%)   |
| Stroke                                                |             | 1172 (4%)                       | 1565 (3%)   |
| PAD                                                   |             | 112 (0%)                        | 161 (0%)    |
| <b>Complications (n%) unless otherwise specified)</b> |             |                                 |             |
| Neuropathy                                            |             | 1039 (3%)                       | 1395 (3%)   |
| Retinopathy                                           |             | 784 (2%)                        | 1139 (3%)   |
| Hypoglycemia                                          |             | 208 (1%)                        | 233 (1%)    |
| eGFR (mean(sd))                                       |             | 86.3 (45.9) <sup>a</sup>        | 83.2 (39.1) |
| Proteinuria                                           | None        | 6328 (63%)                      | 19449 (68%) |
|                                                       | MOD         | 2794 (28%)                      | 7226 (25%)  |
|                                                       | SEV         | 732 (7%)                        | 1497 (5%)   |
|                                                       | NEPH        | 177 (2%)                        | 284 (1%)    |
| <b>Medications (n%)</b>                               |             |                                 |             |
| AHA intensity                                         | None        | 19302 (61%)                     | 19547 (44%) |
|                                                       | Oral only   | 9310 (29%)                      | 20523 (46%) |
|                                                       | Any insulin | 2959 (9%)                       | 4860 (11%)  |
| GLP-1RA                                               |             | 1150 (4%)                       | 2396 (5%)   |
| SGLT2i                                                |             | 2617 (8%)                       | 6757 (15%)  |
| Metformin                                             |             | 8970 (28%)                      | 20073 (45%) |
| Sulfonylurea                                          |             | 2817 (9%)                       | 5566 (12%)  |
| AGI                                                   |             | 25 (0%)                         | 34 (0%)     |
| TZD                                                   |             | 51 (0%)                         | 62 (0%)     |
| DPP4i                                                 |             | 2805 (9%)                       | 8016 (18%)  |



|                                                 |                |                           |              |
|-------------------------------------------------|----------------|---------------------------|--------------|
| Meglitinide                                     |                | 226 (1%)                  | 256 (1%)     |
| Insulin                                         | Basal only     | 1575 (5%)                 | 2699 (6%)    |
|                                                 | Prandial (any) | 1384 (4%)                 | 2161 (5%)    |
| <b>Utilization (mean (sd))</b>                  |                |                           |              |
| Encounters (previous year)                      |                | 7.2 (10.0)                | 9.1 (9.9)    |
| <b>Diabetes Clinical Parameters (mean (sd))</b> |                |                           |              |
| HbA1c                                           |                | 7.2 (1.6) <sup>b</sup>    | 7.1 (1.4)    |
| LDLc                                            |                | 2.3 (1.0) <sup>c</sup>    | 2.1 (1.0)    |
| sBP                                             |                | 130.1 (16.3) <sup>d</sup> | 130.6 (15.7) |
| dBp                                             |                | 77.2 (9.9) <sup>e</sup>   | 77.0 (9.6)   |

Missing measurements defined as completely missing data within the previous two years on one or more of HbA1c, BP, LDLc, or serum creatinine.

<sup>a</sup> Missing in 11,225. <sup>b</sup> Missing in 11,213. <sup>c</sup> Missing in 24,225. <sup>d</sup> Missing in 9,713. <sup>e</sup> Missing in 9,723.

See table legend (Table 2) in main text for abbreviations.

**Table S3: Characteristics of Included Adults in 2015**

| Characteristics                                       | Overall        | M < 40      | M 40-64      | M 65-80     | F < 40      | F 40-64      | F 65-80     |             |
|-------------------------------------------------------|----------------|-------------|--------------|-------------|-------------|--------------|-------------|-------------|
| Number (n)                                            | 32503          | 560         | 8841         | 7719        | 696         | 7831         | 6856        |             |
| <b>Demographics (n%) unless otherwise specified)</b>  |                |             |              |             |             |              |             |             |
| Province                                              | AB             | 8787 (27%)  | 131 (23%)    | 2498 (28%)  | 2265 (29%)  | 145 (21%)    | 2013 (26%)  | 1735 (25%)  |
|                                                       | ON             | 20401 (63%) | 358 (64%)    | 5332 (60%)  | 4768 (62%)  | 441 (63%)    | 4971 (63%)  | 4531 (66%)  |
|                                                       | QC             | 72 (0%)     | 1 (0%)       | 22 (0%)     | 16 (0%)     | 0 (0%)       | 17 (0%)     | 16 (0%)     |
|                                                       | NL             | 186 (1%)    | 10 (2%)      | 45 (1%)     | 39 (1%)     | 1 (0%)       | 55 (1%)     | 36 (1%)     |
|                                                       | MN             | 3057 (9%)   | 60 (11%)     | 944 (11%)   | 631 (8%)    | 109 (16%)    | 775 (10%)   | 538 (8%)    |
| Age (mean(sd))                                        |                | 61.5 (11.1) | 33.0 (5.4)   | 55.4 (6.3)  | 71.1 (4.1)  | 32.9 (5.1)   | 55.2 (6.4)  | 71.3 (4.2)  |
| Sex                                                   | Male           | 17120 (53%) | 560 (100%)   | 8841 (100%) | 7719 (100%) | 0 (0%)       | 0 (0%)      | 0 (0%)      |
|                                                       | Female         | 15383 (47%) | 0 (0%)       | 0 (0%)      | 0 (0%)      | 696 (100%)   | 7831 (100%) | 6856 (100%) |
| Diabetes duration (mean(sd))                          |                | 3.8 (4.8)   | 3.0 (2.3)    | 3.6 (3.6)   | 4.3 (6.3)   | 3.1 (2.8)    | 3.7 (4.5)   | 4.0 (4.6)   |
| Current smoker                                        |                | 1326 (22%)  | 23 (23%)     | 430 (28%)   | 235 (17%)   | 48 (32%)     | 417 (27%)   | 173 (14%)   |
| BMI (mean(sd))                                        |                | 32.2 (7.3)  | 33.0 (8.7)   | 32.4 (6.9)  | 30.9 (5.9)  | 35.0 (8.9)   | 33.7 (8.3)  | 31.4 (7.1)  |
| <b>Comorbidities (n%)</b>                             |                |             |              |             |             |              |             |             |
| CAD                                                   |                | 3440 (11%)  | 10 (2%)      | 906 (10%)   | 1485 (19%)  | 5 (1%)       | 370 (5%)    | 664 (10%)   |
| CHF                                                   |                | 1489 (5%)   | 4 (1%)       | 298 (3%)    | 580 (8%)    | 6 (1%)       | 198 (3%)    | 403 (6%)    |
| Stroke                                                |                | 925 (3%)    | 8 (1%)       | 186 (2%)    | 339 (4%)    | 12 (2%)      | 149 (2%)    | 231 (3%)    |
| PAD                                                   |                | 123 (0%)    | 0 (0%)       | 27 (0%)     | 66 (1%)     | 0 (0%)       | 13 (0%)     | 17 (0%)     |
| <b>Complications (n%) unless otherwise specified)</b> |                |             |              |             |             |              |             |             |
| Neuropathy                                            |                | 711 (2%)    | 8 (1%)       | 167 (2%)    | 166 (2%)    | 13 (2%)      | 214 (3%)    | 143 (2%)    |
| Retinopathy                                           |                | 629 (2%)    | 7 (1%)       | 123 (1%)    | 216 (3%)    | 6 (1%)       | 98 (1%)     | 179 (3%)    |
| Hypoglycemia                                          |                | 180 (1%)    | 2 (0%)       | 69 (1%)     | 31 (0%)     | 3 (0%)       | 48 (1%)     | 27 (0%)     |
| eGFR (mean(sd))                                       |                | 82.1 (27.2) | 104.6 (43.3) | 88.4 (25.9) | 74.7 (23.4) | 104.0 (35.8) | 87.5 (26.5) | 72.2 (24.9) |
| Proteinuria                                           | None           | 14586 (70%) | 246 (76%)    | 4161 (70%)  | 3372 (64%)  | 259 (71%)    | 3485 (75%)  | 3063 (71%)  |
|                                                       | MOD            | 4995 (24%)  | 65 (20%)     | 1404 (24%)  | 1499 (29%)  | 87 (24%)     | 914 (20%)   | 1026 (24%)  |
|                                                       | SEV            | 1067 (5%)   | 11 (3%)      | 328 (5%)    | 330 (6%)    | 17 (5%)      | 207 (4%)    | 174 (4%)    |
|                                                       | NEPH           | 204 (1%)    | 3 (1%)       | 74 (1%)     | 56 (1%)     | 4 (1%)       | 34 (1%)     | 33 (1%)     |
| <b>Medications (n%)</b>                               |                |             |              |             |             |              |             |             |
| GLP-1RA                                               |                | 470 (1%)    | 6 (1%)       | 147 (2%)    | 61 (1%)     | 20 (3%)      | 189 (2%)    | 47 (1%)     |
| SGLT2i                                                |                | 799 (2%)    | 8 (1%)       | 305 (3%)    | 126 (2%)    | 15 (2%)      | 244 (3%)    | 101 (1%)    |
| Metformin                                             |                | 14878 (46%) | 217 (39%)    | 4368 (49%)  | 3570 (46%)  | 258 (37%)    | 3490 (45%)  | 2975 (43%)  |
| Sulfonylurea                                          |                | 5514 (17%)  | 85 (15%)     | 1655 (19%)  | 1431 (19%)  | 74 (11%)     | 1212 (15%)  | 1057 (15%)  |
| AGI                                                   |                | 73 (0%)     | 0 (0%)       | 18 (0%)     | 22 (0%)     | 0 (0%)       | 11 (0%)     | 22 (0%)     |
| TZD                                                   |                | 258 (1%)    | 2 (0%)       | 69 (1%)     | 96 (1%)     | 2 (0%)       | 37 (0%)     | 52 (1%)     |
| DPP4i                                                 |                | 4722 (15%)  | 58 (10%)     | 1462 (17%)  | 1141 (15%)  | 58 (8%)      | 1084 (14%)  | 919 (13%)   |
| Meglitinide                                           |                | 477 (1%)    | 2 (0%)       | 129 (1%)    | 134 (2%)    | 6 (1%)       | 110 (1%)    | 96 (1%)     |
| Insulin                                               | Basal only     | 1962 (6%)   | 27 (5%)      | 624 (7%)    | 442 (6%)    | 42 (6%)      | 488 (6%)    | 339 (5%)    |
|                                                       | Prandial (any) | 2165 (7%)   | 65 (12%)     | 586 (7%)    | 479 (6%)    | 80 (11%)     | 570 (7%)    | 385 (6%)    |
| <b>Utilization (mean (sd))</b>                        |                |             |              |             |             |              |             |             |
| Encounters (previous year)                            |                | 9.6 (9.7)   | 8.4 (17.6)   | 8.4 (8.7)   | 9.6 (9.2)   | 10.0 (9.2)   | 10.2 (10.1) | 10.5 (9.7)  |
| <b>Diabetes Clinical Parameters (mean (sd))</b>       |                |             |              |             |             |              |             |             |

Appendix 1, as submitted by the authors. Appendix to: Nandiwada S, Manca DP, Yeung RO, et al. Achievement of treatment targets among patients with type 2 diabetes in 2015 and 2020 in Canadian primary care. *CMAJ* 2023. doi: 10.1503/cmaj.220673. Copyright © 2023 The Author(s) or their employer(s). To receive this resource in an accessible format, please contact us at [cmajgroup@cmaj.ca](mailto:cmajgroup@cmaj.ca).

|       |              |              |              |              |              |              |              |
|-------|--------------|--------------|--------------|--------------|--------------|--------------|--------------|
| HbA1c | 7.1 (1.4)    | 7.6 (1.8)    | 7.3 (1.5)    | 7.0 (1.2)    | 7.3 (1.8)    | 7.2 (1.6)    | 6.9 (1.1)    |
| LDLc  | 2.2 (0.9)    | 2.5 (0.9)    | 2.2 (0.9)    | 1.9 (0.8)    | 2.5 (0.8)    | 2.4 (0.9)    | 2.2 (0.9)    |
| sBP   | 129.0 (16.1) | 125.2 (14.1) | 129.1 (15.6) | 129.8 (16.1) | 121.3 (14.8) | 127.2 (15.7) | 131.0 (16.8) |
| dBp   | 76.0 (9.8)   | 79.0 (9.7)   | 78.8 (9.5)   | 73.7 (9.6)   | 77.6 (10.0)  | 77.2 (9.5)   | 73.2 (9.6)   |

**Table S4: Crude(-ish) Age and Sex Group Odds Ratios for Target Achievement**

| Target                 | Age   | Adjusted Odds Ratio (aOR) of target achievement |                              |                                 |
|------------------------|-------|-------------------------------------------------|------------------------------|---------------------------------|
|                        |       | Females                                         | Males                        | Period Effect                   |
| HbA1c                  | <40   | 1.06 (0.95, 1.17), p = 0.298                    | 0.62 (0.55, 0.69), p < 0.001 | 0.98 (0.95, 1.00),<br>p = 0.061 |
|                        | 40-64 | 0.98 (0.93, 1.02), p = 0.265                    | 0.80 (0.77, 0.83), p < 0.001 |                                 |
|                        | 65-79 | 1.20 (1.14, 1.25), p < 0.001                    | REF                          |                                 |
| BP                     | <40   | 1.29 (1.17, 1.42), p < 0.001                    | 0.89 (0.79, 1.00), p = 0.043 | 0.84 (0.82, 0.86),<br>p < 0.001 |
|                        | 40-64 | 1.01 (0.96, 1.05), p = 0.784                    | 0.80 (0.77, 0.83), p < 0.001 |                                 |
|                        | 65-79 | 0.94 (0.90, 0.99), p = 0.009                    | REF                          |                                 |
| LDLc                   | <40   | 0.19 (0.17, 0.21), p < 0.001                    | 0.24 (0.21, 0.27), p < 0.001 | 1.24 (1.21, 1.28),<br>p < 0.001 |
|                        | 40-64 | 0.31 (0.29, 0.32), p < 0.001                    | 0.51 (0.48, 0.53), p < 0.001 |                                 |
|                        | 65-79 | 0.57 (0.55, 0.60), p < 0.001                    | REF                          |                                 |
| All 3 clinical targets | <40   | 0.42 (0.36, 0.49), p < 0.001                    | 0.30 (0.25, 0.37), p < 0.001 | 1.03 (0.99, 1.07),<br>p = 0.167 |
|                        | 40-64 | 0.47 (0.44, 0.49), p < 0.001                    | 0.57 (0.54, 0.60), p < 0.001 |                                 |
|                        | 65-79 | 0.76 (0.71, 0.80), p < 0.001                    | REF                          |                                 |
| Statin use             | <40   | 0.09 (0.07, 0.11), p < 0.001                    | 0.21 (0.17, 0.24), p < 0.001 | 0.99 (0.97, 1.02),<br>p = 0.684 |
|                        | 40-64 | 0.48 (0.46, 0.50), p < 0.001                    | 0.72 (0.69, 0.75), p < 0.001 |                                 |
|                        | 65-79 | 0.82 (0.79, 0.86), p < 0.001                    | REF                          |                                 |
| ACEi/ARB use           | <40   | 0.16 (0.14, 0.18), p < 0.001                    | 0.32 (0.28, 0.38), p < 0.001 | 0.97 (0.94, 0.99),<br>p = 0.007 |
|                        | 40-64 | 0.58 (0.55, 0.60), p < 0.001                    | 0.76 (0.73, 0.80), p < 0.001 |                                 |
|                        | 65-79 | 0.93 (0.89, 0.97), p = 0.001                    | REF                          |                                 |

These odds ratios are produced by logistic regression models contain dummy variables for age and sex groups and the period (2020 vs 2015 [REF]) main effect only, without the period\*age interaction.
